# Supplementary material for: CD36 and GPR120 Methylation Associates with Orosensory Detection Thresholds for Fat and Bitter in Algerian Young Obese Children
Source: PubMed Central journal article supplement (PMC7356363; doi:10.3390/jcm9061956), 2020-06-23
Supplement: jcm-09-01956-s001.pdf [file jcm-09-01956-s001.pdf]

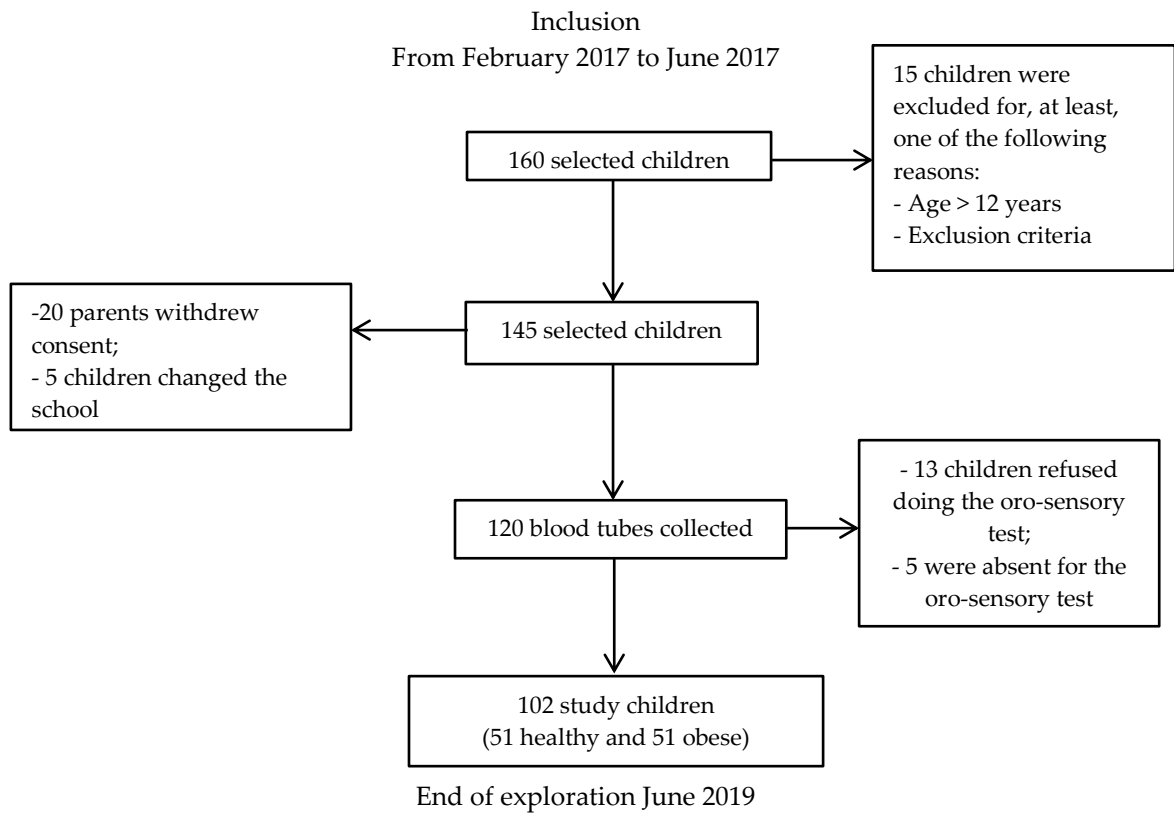

**Figure S1: participant Flow Chart**

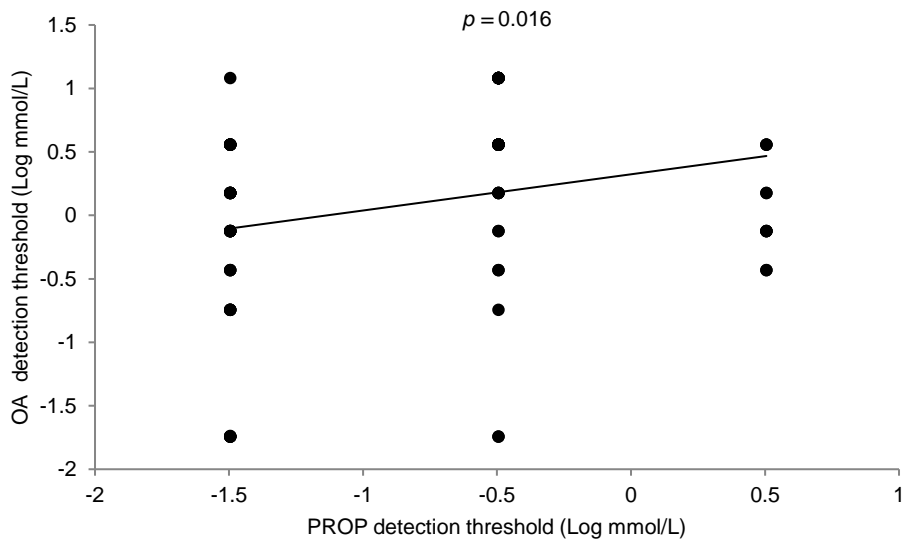

**Figure S2: correlation between OA and PROP detection concentration in the whole population**

## Table S1: Food preferences questionnaire

This questionnaire relates to your Food Preferences, that is to say your tastes in terms of food. Obviously, this questionnaire has no commercial purpose but is part of a public health research program that aims to better understand eating behaviors by studying the link between food consumption and declared preferences.

The purpose of this section is to measure your level of attraction to various foods. For each food, indicate how you like it on the scale presented.

For example, to answer the question "How do you like duck meat?" : If you like duck meat moderately (you don't hate but you don't love), then you check the box in the middle of the scale.

I really don't like at all (-)          I really like so much (+)  I have never tasted

If you have never had the opportunity to taste it, check the "I have never tasted" box.  
Answer spontaneously and know that there is no right or wrong answer.

**How do you like...**

**Aperitif cookies:**

I really don't like at all (-)          I really like so much (+)  I have never tasted

**Chips :**

I really don't like at all (-)          I really like so much (+)  I have never tasted

**the peanuts:**

I really don't like at all (-)          I really like so much (+)  I have never tasted

**country or liver pâté:**

I really don't like at all (-)          I really like so much (+)  I have never tasted

**smoked sausage**

I really don't like at all (-)          I really like so much (+)  I have never tasted

**dry sausage:**

I really don't like at all (-)          I really like so much (+)  I have never tasted

**rillettes :**

I really don't like at all (-)          I really like so much (+)  I have never tasted

**salami :**

I really don't like at all (-)          I really like so much (+)  I have never tasted

**soft and creamy cheese**

I really don't like at all (-)          I really like so much (+)  I have never tasted

**Tartiflette:**

I really don't like at all (-)          I really like so much (+)  I have never tasted

**melted cheese:**

I really don't like at all (-)          I really like so much (+)  I have never tasted

**roquefort sauce:**

I really don't like at all (-)          I really like so much (+)  I have never tasted

**kebabs:**

I really don't like at all (-)          I really like so much (+)  I have never tasted

**hamburgers :**

I really don't like at all (-)          I really like so much (+)  I have never tasted

**poultry nuggets:**

I really don't like at all (-)          I really like so much (+)  I have never tasted

**fruit nectars:**

I really don't like at all (-)          I really like so much (+)  I have never tasted

**sweet dried fruits (e.g. raisins, figs, etc.):**

I really don't like at all (-)          I really like so much (+)  I have never tasted

**honey :**

I really don't like at all (-)          I really like so much (+)  I have never tasted

**chestnut cream:**

I really don't like at all (-)          I really like so much (+)  I have never tasted

**the candies :**

I really don't like at all (-)          I really like so much (+)  I have never tasted

**biscuits topped with or filled with fruit (e.g. tray, wafer, etc.):**

I really don't like at all (-)          I really like so much (+)  I have never tasted

**Breads:**

I really don't like at all (-)          I really like so much (+)  I have never tasted

**gingerbread:**

I really don't like at all (-)          I really like so much (+)  I have never tasted

**floating island:**

I really don't like at all (-)          I really like so much (+)  I have never tasted

**dessert creams:**

I really don't like at all (-)          I really like so much (+)  I have never tasted

**Nutella type chocolate / hazelnut spread:**

I really don't like at all (-)          I really like so much (+)  I have never tasted

**la crème brûlée :**

I really don't like at all (-)          I really like so much (+)  I have never tasted

**chocolate mousse :**

I really don't like at all (-)          I really like so much (+)  I have never tasted

**the chocolate cake :**

I really don't like at all (-)          I really like so much (+)  I have never tasted

**the brownie:**

I really don't like at all (-)          I really like so much (+)  I have never tasted

**Paris Brest:**

I really don't like at all (-)          I really like so much (+)  I have never tasted

**vanilla, hazelnut, praline, ... wafers:**

I really don't like at all (-)          I really like so much (+)  I have never tasted

**shortbread cookies (ex: Breton puck, sprits, ...):**

I really don't like at all (-)          I really like so much (+)  I have never tasted

**croissants**

I really don't like at all (-)          I really like so much (+)  I have never tasted

**the chocolate rolls:**

I really don't like at all (-)          I really like so much (+)  I have never tasted

**apple turnovers:**

I really don't like at all (-)          I really like so much (+)  I have never tasted

**donuts:**

I really don't like at all (-)          I really like so much (+)  I have never tasted

**Home prepared food only**

I really don't like at all (-)          I really like so much (+)  I have never tasted

**Salads:**

I really don't like at all (-)          I really like so much (+)  I have never tasted

**Home prepared snacks:**

I really don't like at all (-)          I really like so much (+)  I have never tasted

**Table S2: Relationship between preferred food pattern and obesity**

| Food contents                                             | Lean Children<br><i>n</i> = 51 | Obese Children<br><i>n</i> = 51 |
|-----------------------------------------------------------|--------------------------------|---------------------------------|
| Meat, chips, cheese,<br>breads and Chocolate              | 13                             | 43*                             |
| Home prepared food<br>(parents restrictions) and<br>candy | 38                             | 8*                              |

$\chi^2$  \* $p$  < 0.0001. The asterisks show the significant differences as compared to values in the respective healthy participants.
